# Supplementary material for: Top-down tailoring of nanostructured manganese molybdate enhances its lithium storage properties
Source: Royal Society of Chemistry journal article supplement (doi:10.1039/c9ce01023h), 2019-01-01
Supplement: c9ce01023h1.pdf [file c9ce01023h1.pdf]

## Supporting Information

### **Top-down tailoring of nanostructured manganese molybdate enhances its lithium storage properties**

Lifeng Zhang<sup>\*a,b</sup>, Kechao Shen<sup>a</sup>, Yangguang Li<sup>‡a</sup>, Tong Zha<sup>‡a</sup>, Yifei Song<sup>a</sup>, Yi Liu<sup>a,b</sup>,

Shouwu Guo<sup>\*a,c</sup>

<sup>a</sup>School of Materials Science and Engineering, Shaanxi University of Science and Technology, Xi'an 710021, Shaanxi, China

<sup>b</sup>School of Material Science and Engineering, Shaanxi Key Laboratory of Green Preparation and Functionalization for Inorganic Materials, Shaanxi University of Science and Technology, Xi'an 710021, Shaanxi, China

<sup>c</sup>School of Electronic Information and Electrical Engineering, Shanghai Jiao Tong University, Shanghai 200240, China

\*Corresponding Author, E-mail: zhanglifeng@sust.edu.cn; guoshouwu@outlook.com

‡These authors contributed equally to this work.

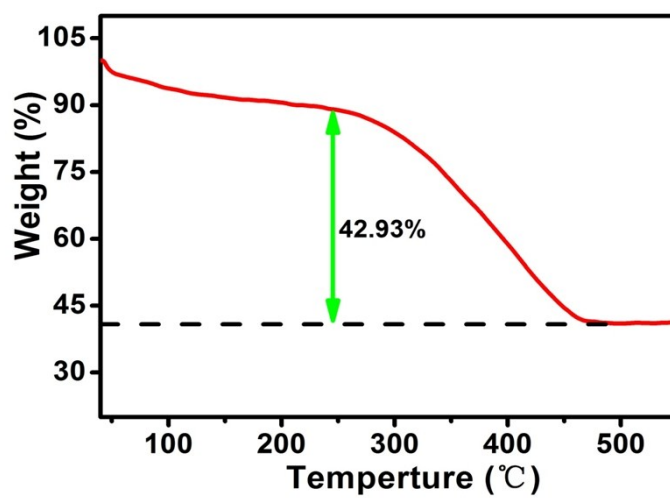

Figure S1. TG curve of the MnMoO<sub>4</sub>/NC composite.

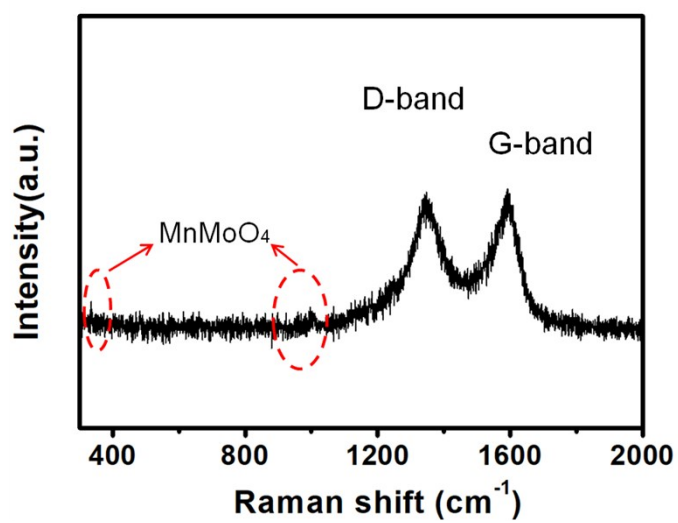

Figure S2. Raman spectrum of the MnMoO<sub>4</sub>/NC composite.

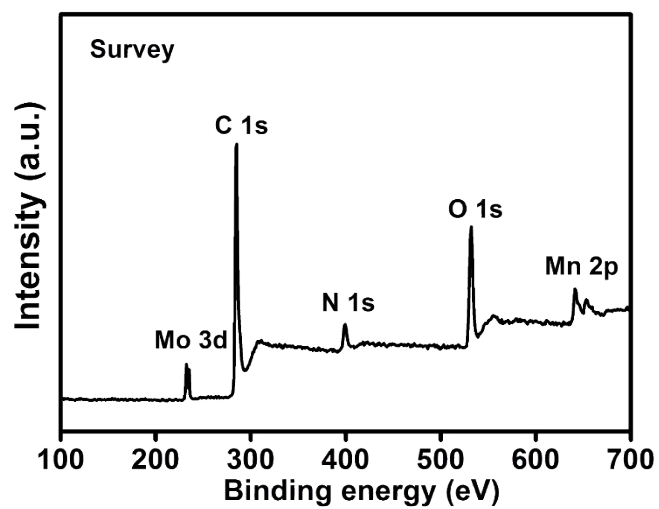

**Figure S3.** The survey spectrum of the MnMoO<sub>4</sub>/NC composite.

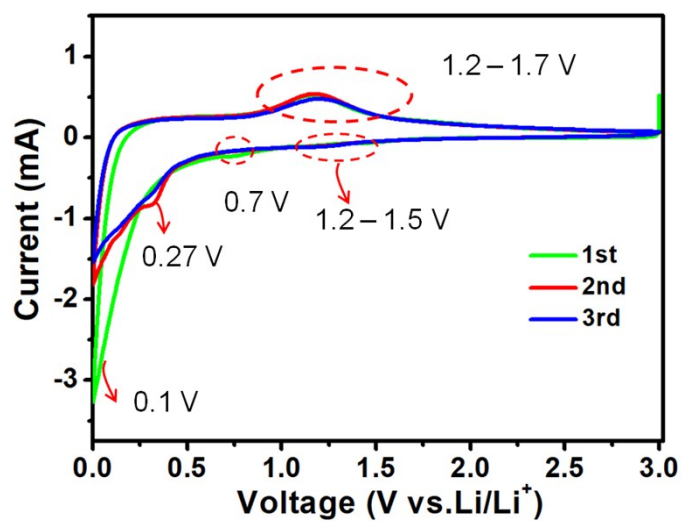

**Figure S4.** CV curve of the MnMoO<sub>4</sub>/NC composite at 0.1 mV S<sup>-1</sup>.

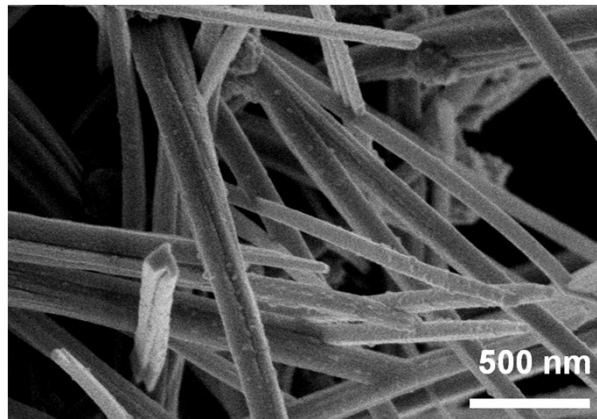

**Figure S5.** SEM image of the MnMoO<sub>4</sub> nanorods.

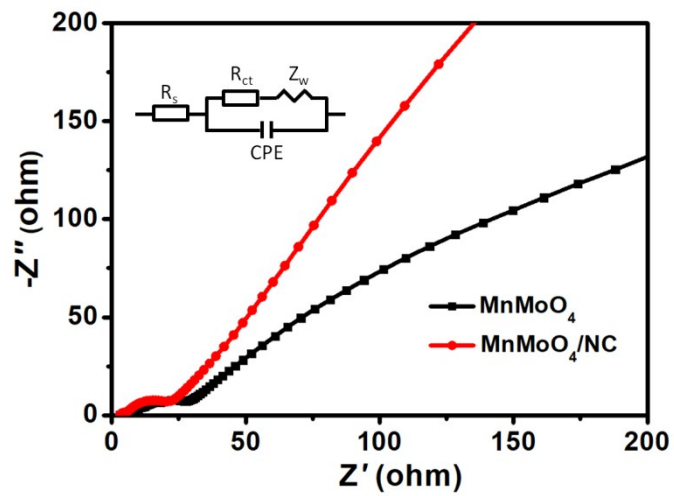

**Figure S6.** EIS spectra of the MnMoO<sub>4</sub>/NC composite and pure MnMoO<sub>4</sub>. The inset is corresponding equivalent circuit.

**Table S1.** Comparison of electrochemical performance of molybdate-based anode materials

| Molybdates                                                   | Capacity and stability<br>(mAh g <sup>-1</sup> ) | Rate capability<br>(mAh g <sup>-1</sup> )    | Ref.      |
|--------------------------------------------------------------|--------------------------------------------------|----------------------------------------------|-----------|
| MnMoO <sub>4</sub> /NC nanospheres                           | 657 after 100 cycles at 0.1 A g <sup>-1</sup>    | 375 after 200 cycles at 1 A g <sup>-1</sup>  | This work |
| MnMoO <sub>4</sub> nanorods                                  | 131 after 100 cycles at 0.5 A g <sup>-1</sup>    | 285 after 40 cycles at 1 A g <sup>-1</sup>   | [1]       |
| NiMoO <sub>4</sub> nanorods                                  | 120 after 70 cycles at 0.1 A g <sup>-1</sup>     | -                                            | [2]       |
| MgMoO <sub>4</sub> /rGO                                      | 597 after 300 cycles at 0.1 A g <sup>-1</sup>    | 224 after 60 cycles at 1 A g <sup>-1</sup>   | [3]       |
| Mn <sub>2</sub> Mo <sub>3</sub> O <sub>8</sub> /rGO          | 518 after 50 cycles at 0.1 A g <sup>-1</sup>     | 495 after 50 cycles at 0.2 A g <sup>-1</sup> | [4]       |
| Ag <sub>2</sub> Mo <sub>2</sub> O <sub>7</sub> powder        | 190 after 70 cycles at 0.1 A g <sup>-1</sup>     | 124 after 70 cycles at 0.5 A g <sup>-1</sup> | [5]       |
| Cu <sub>3</sub> Mo <sub>2</sub> O <sub>9</sub> micropompons  | 153 after 100 cycles at 0.1 A g <sup>-1</sup>    | -                                            | [6]       |
| ZnMoO <sub>4</sub> nanoparticles                             | 389 after 90 cycles at 0.1 A g <sup>-1</sup>     | 207 after 80 cycles at 0.5 A g <sup>-1</sup> | [7]       |
| ZnMoO <sub>4</sub> /rGO                                      | 632 after 100 cycles at 0.1 A g <sup>-1</sup>    | -                                            | [8]       |
| Mn <sub>2</sub> Mo <sub>3</sub> O <sub>8</sub> nanoparticles | 210 after 50 cycles at 0.1 A g <sup>-1</sup>     | 1A g <sup>-1</sup>                           | [9]       |

NC: nitrogen-doped carbon

rGO: reduced graphene oxide

-: not available

## Reference

1. S. Patil, B. Kishore, M. K. Nagaraj, N. Ganganagappa, U. Velu, *ChemistrySelect* 2018, **3**, 7490–7495.
2. W. W. Xiao, J. S. Chen, C. M. Li, R. Xu, X. W. Lou, *Chem. Mater.* 2010, **22**, 746–754.
3. L. Zhang, W. He, M. Ling, K. Shen, Y. Liu, S. Guo, *Electrochim. Acta* 2017, **252**, 322–330.
4. S. Petnikota, S. K. Marka, V. V. S. S. Srikanth, M. V. Reddy, B. V. R. Chowdari, *Electrochim.*

*Acta* 2015, **178**, 699–708.

5. N. Chen, Y. Gao, M. N. Zhang, X. Meng, C. Z. Wang, F. Du, G. Chen, *Chem. Eur. J.* 2016, **22**, 7248–7254.
6. J. Xia, L. Song, W. Liu, Y. Teng, Q. Wang, L. Zhao, M. Ruan, *RSC Adv.* 2015, **5**, 12015–12024.
7. J. Fei, Q. Sun, J. Li, Y. Cui, J. Huang, W. Hui, H. Hu, *Mater. Lett.* 2017, **198**, 4–7.
8. R. Xue, W. Hong, Z. Pan, W. Jin, H. Zhao, Y. Song, *Electrochim. Acta.* 2016, **222**, 838–844.
9. B. Das, M. V. Reddy, C. Krishnamoorthi, *Electrochim. Acta.* 2009, **54**, 3360–3373.
